# Supplementary material for: Examining the endurance of the balanced scorecard
Source: Royal Society of Chemistry journal article supplement (doi:10.1039/d0bm01221a), 2001-01-01
Supplement: d0bm01221a1.pdf [file d0bm01221a1.pdf]

## Supporting Information

### **NIR-II FL/PA Dual-modal Imaging Long-term Tracking of Human Umbilical Cord-derived Mesenchymal Stem Cells Labeled with Melanin Nanoparticles and Visible HUMSCs-based Liver Regeneration for Acute Liver Failure**

Wenwen Cai<sup>a,b</sup>, Jinghua Sun<sup>a,b</sup>, Yao Sun<sup>c</sup>, Xuhui Zhao<sup>b</sup>, Chunyan Guo<sup>b</sup>, Jie Dong<sup>b</sup>, Xiaoyang Peng<sup>b</sup> and Ruiping Zhang<sup>a,b\*</sup>

<sup>a</sup> Imaging Department, The Affiliated Bethune Hospital of Shanxi Medical University, Taiyuan 030032, China

<sup>b</sup> Shanxi Medical University, Taiyuan 030001, China

<sup>c</sup> Key Laboratory of Pesticides and Chemical Biology, Ministry of Education, College of Chemistry, Central China Normal University, Wuhan 430079, China

\* E-mail: zrp\_7142@sxmu.edu.cn

Wenwen Cai, Jinghua Sun and Yao Sun were contributed equally to this work.

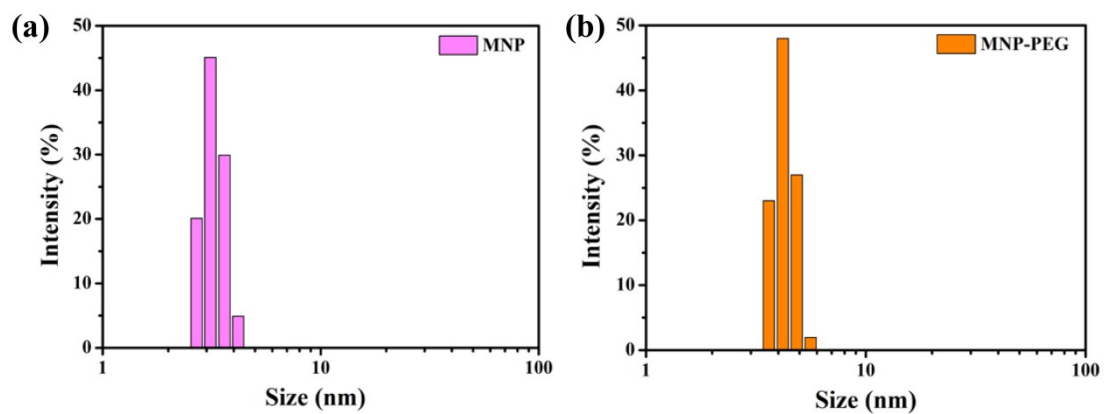

**Figure S1.** Hydrodynamic size distribution of MNP and MNP-PEG determined by DLS.

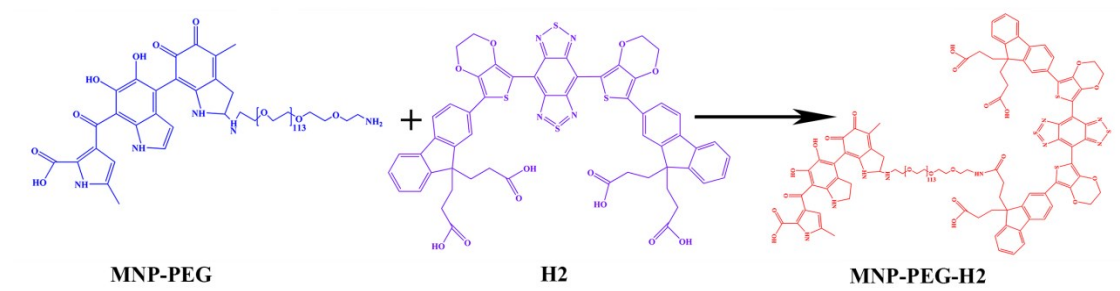

**Figure S2.** Synthetic route of MNP-PEG-H2.

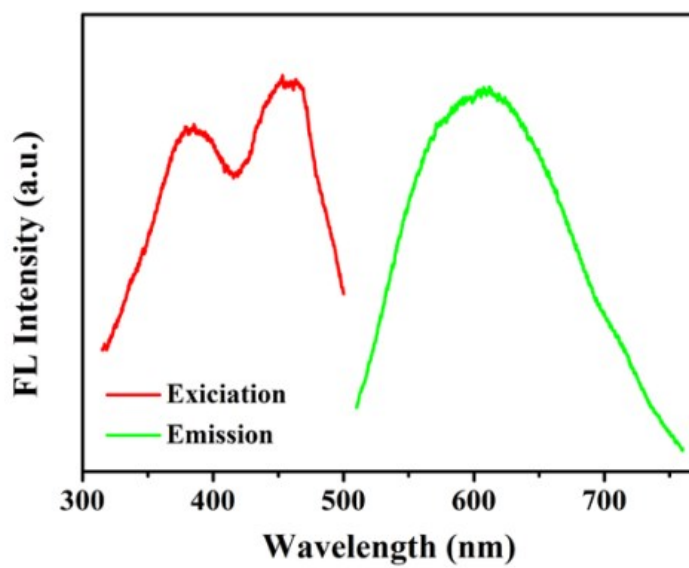

**Figure S3.** The fluorescence excitation and emission spectra of MNP-PEG-H2 in visible region.

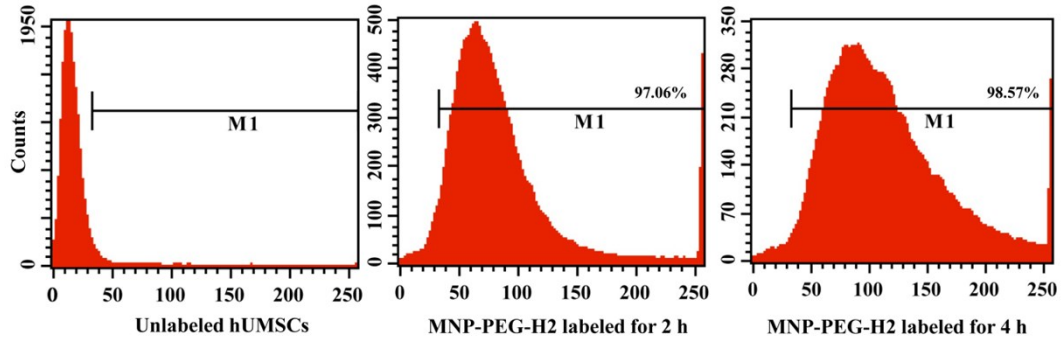

**Figure S4.** Flow cytometry quantitative analysis of unlabeled, MNP-PEG-H2 labeled hUMSCs for 2 h and 4 h.

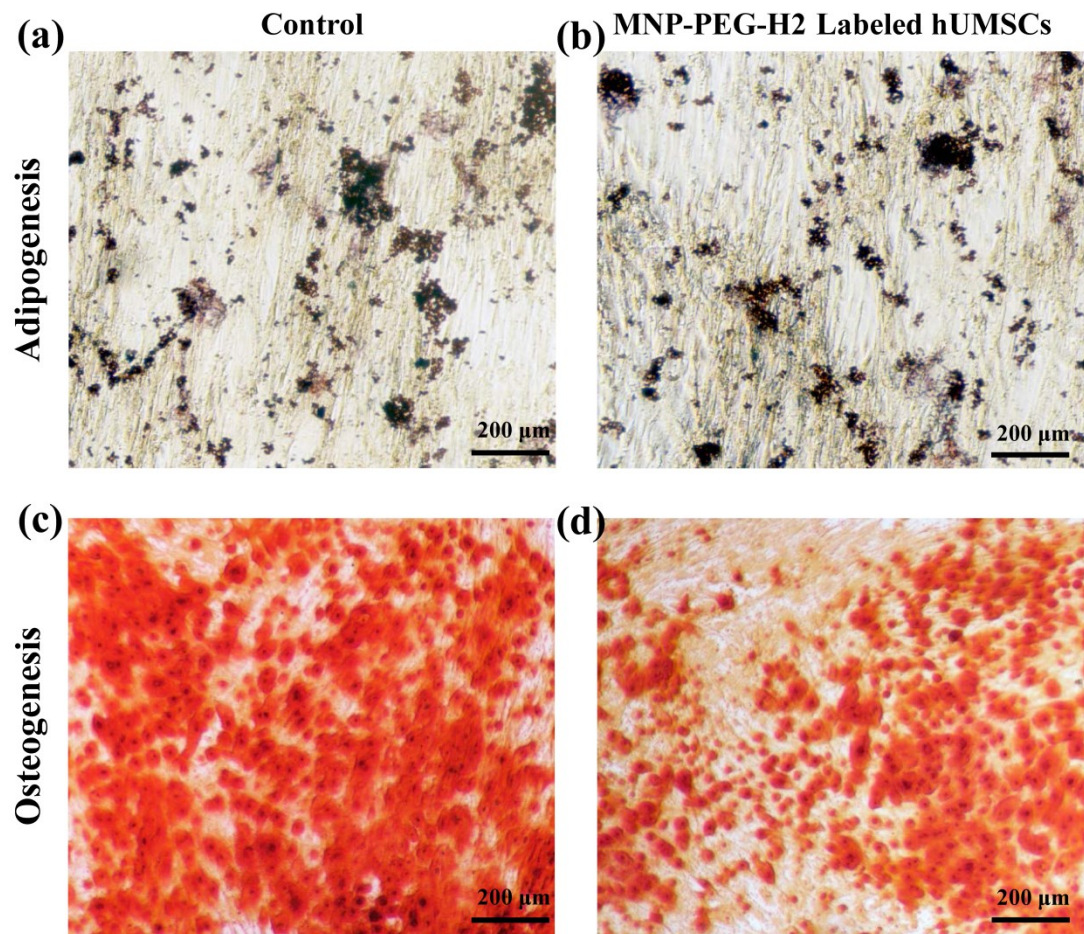

**Figure S5.** Assessment of adipogenic and osteogenesis differentiation potential of control and MNP-PEG-H2 labeled hUMSCs.

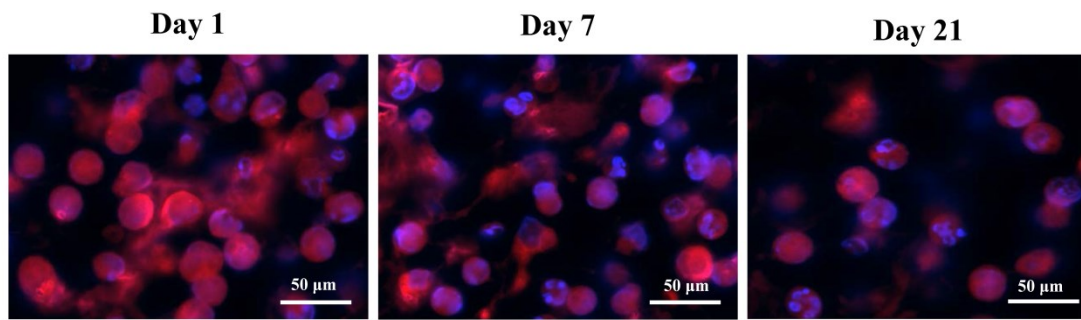

**Figure S6.** Histological staining of the MNP-PEG-H2 labeled hUMSCs at day 1, 7 and 21 after subcutaneous transplantation in vivo. The nuclei are stained in blue, and the MNP-PEG-H2 signal was red.

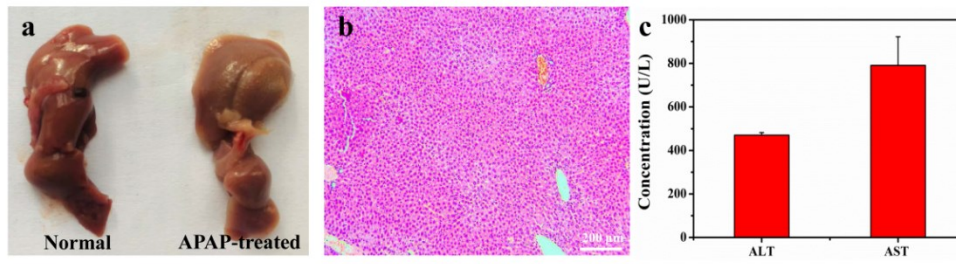

**Figure S7.** Assessment of APAP-induced ALF. (a) The morphology of normal and APAP-treated livers. (b) The H&E staining of APAP-treated liver. (c) The serum ALT and AST levels of APAP-treated mice.



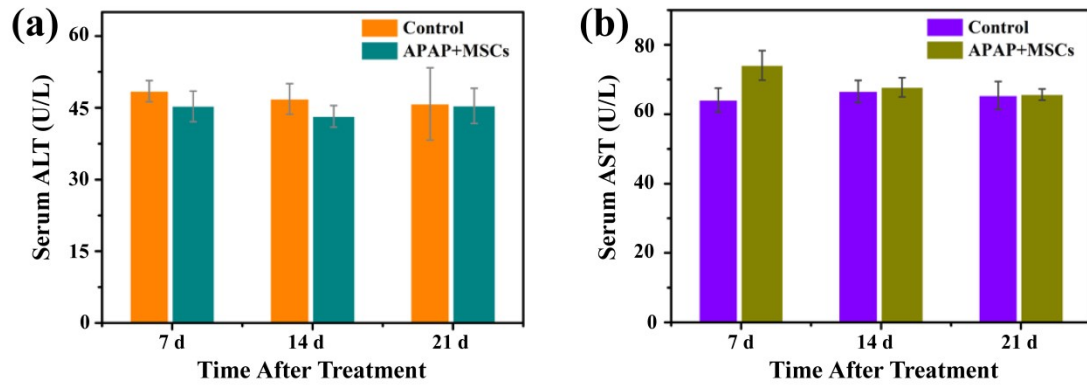

**Figure S8.** The long-term hepatic function of MNP-PEG-H2-labeled hUMSCs for mice with ALF. The levels of ALT (a) and AST (b) in the blood serum in healthy mice (control) and ALF mice with hUMSCs transplantation.
